## RESEARCH

# Evolution of Hierarchy in Bacterial Metabolic Networks

Aaron Goodman and Marcus Feldman\*

\*Correspondence:

mfeldman@stanford.edu

Department of Biology, Stanford University, Stanford, CA, 94305, USA

Full list of author information is available at the end of the article

## Abstract

**Background:** Through simulation studies and genomic data analysis, researchers have shown that modularity in metabolic networks is an important adaptive mechanism enabling survival in changing environments. Another global property of networks, flow hierarchy, is often used in optimizing information flow in designed networks. Hierarchy also arises in self-organized networks as an optimal way to aggregate flows while minimizing costs of connections.

**Results:** Using a comparative approach on 2,935 bacterial metabolic networks, we show that hierarchy evolves with modularity and is conserved to a high degree. Hierarchy in bacterial metabolic networks reflects a fundamental tradeoff between growth rate and biomass production, and reflects a bacteria's realized ecological strategy. Additionally, by inferring the ancestral metabolic networks, we find that hierarchy decreases with distance from the root of the tree, suggesting the important pressure of increased growth rate relative to efficiency in the face of competition.

**Conclusions:** Just as hierarchical character is an important structural property in efficiently engineered systems, we see that it evolves in self-organized bacterial metabolic networks, is reflective of the life-history strategy of the bacteria, and plays an important role in network organization and efficiency.

**Keywords:** modularity; hierarchy; metabolism; bacteria; reverse ecology

## Background

In characterizing bacteria, we seek to understand both their internal processes and how they interact with other species and their environments. Techniques in cell and molecular biology have been very helpful in understanding the inner workings of bacteria, but do not address the ecological context of bacteria. Increasingly,

8 metagenomic techniques are being used to simultaneously sequence all of the bac-  
 9 teria present in a given environment. However, these techniques can only tell us a  
 10 limited amount of information about particular species, where they are found, their  
 11 relative abundances, and co-occurrence patterns.

12 One way we can move beyond the correlational profiles of metagenomics to under-  
 13 stand the underlying mechanisms is by studying a bacterium's metabolic network  
 14 and its evolution. A bacterium's ability to reproduce depends on the efficiency of its  
 15 metabolism, which we can study as a network of metabolites linked together by the  
 16 enzymes that transform one metabolite into another [1]. These networks metabolic  
 17 reflect the environmental pressures which guided bacterial evolution, and the struc-  
 18 ture of these networks varies across the bacterial kingdom. Thus, by studying its  
 19 metabolic network we can begin to understand the ecological role the bacterium  
 20 occupies. Such approaches have shown that metabolic networks can predict the  
 21 minimal nutrients a bacterium needs to grow, as well as mutualistic relationships  
 22 between bacteria, and their major ecological niche [2][3][4].

23 In studying these metabolic networks, we can draw from work done on networks in  
 24 other fields, particularly the study of information accrual networks. In the process of  
 25 synthesizing the complex molecules needed for survival, bacteria reduce the overall  
 26 entropy in the cell. This reduction, accomplished by the synthesis pathways, can also  
 27 be viewed as an increase of information, given the thermodynamic equivalence of  
 28 entropy reduction and information accrual. Thus we can use the metabolic network  
 29 graph to study the flow of information through the cell.

30 Information accrual networks are found in engineering, where they are used in the  
 31 design of control systems, and in the social sciences to study the organization of  
 32 the firm [5][6]. In these fields, networks are often constructed to have a hierarchical  
 33 structure of information flow. In control systems, information is acquired at the  
 34 lowest level of the hierarchy and transmitted to higher levels, where it is aggregated  
 35 and passed upward; at the same time orders come from the top of the hierarchi-  
 36 cal network and are passed down to lower levels. These networks are constructed  
 37 with the topology imposed upon them. However, top-down network design is not  
 38 necessary for the emergence of hierarchy. When measured in degree rather than  
 39 in absolute terms, hierarchical characteristics are observed in many self-organized  
 40 systems such as food webs, supply chains, and transcription factor networks [7].

41 The global reaching centrality (GRC) is a commonly used quantitative measure  
 42 of flow hierarchy; it is defined as the average difference between the maximum  
 43 local reaching centrality (i.e. fraction of nodes in the network accessible by each  
 44 node of the network) and the local reaching centrality. Other, less widely used  
 45 measures of flow hierarchy are an eigenvector centrality based method, the fraction  
 46 of edges participating in cycles, or by decomposition into treeness, feedforwardness,  
 47 and orderability [8][9] [7].

48 Previous study of the hierarchical nature of metabolics networks has focused on  
 49 containment hierarchy, which characterizes the recursive property of networks con-  
 50 sisting of modules containing other modules is the containment hierarchy, which  
 51 is often measured by the cophenetic coefficient [14]. Metabolic networks have been  
 52 shown to be composed of self-similar modules of metabolites and modules of mod-  
 53 ules and that these modules correspond to known pathways [15][16]. The hierarchi-  
 54 cal modular organization of metabolic networks has been hypothesized to increase  
 55 evolvability of metabolism [17]. Simulations of Boolean logic networks have sug-  
 56 gested that modularity evolves in changing environments, and it has been hypoth-  
 57 esized that this would be reflected in bacterial metabolic networks, though this has  
 58 not been borne out [10][11][12]. The difference in modularity of metabolic networks  
 59 has been found to be moderately correlated with the phylogenetic divergence of  
 60 the organisms. Based on imputed ancestral metabolic networks, there is a general  
 61 trend of loss of modularity over evolutionary time due to the addition of peripheral  
 62 pathways during niche specialization [13].

63 In this work, we focus on the heretofore neglected flow hierarchy. Flow and con-  
 64 tainment hierarchies describe different properties of the same network. The contain-  
 65 ment hierarchy of a neural network of *C. elegans* represents the spatial organization  
 66 of the physical neurons and the flow hierarchy represents the flow of information  
 67 from the sensory to motor neurons [18]. Flow hierarchy has been shown to evolve  
 68 in networks that have costs to each connection [19].

69 Although flow hierarchy (hereafter referred to as hierarchy) has not been well  
 70 studied in metabolic networks, it has been identified in a variety of self-organized  
 71 networks, including food webs, neural networks, and the transcription factor net-  
 72 work in *D. melanogaster*, where the degrees of hierarchy were significantly higher  
 73 than would be expected in a random network with the same degree distribution [7].

Degree of hierarchy has also been used to make inferences about the forces guiding the development of networks [20]. Hierarchical characteristics in emergent social networks can predict the costs of maintaining information-sharing relationships, and in supply chains reflects the degree of market variability they are able to withstand [21].

In simulated evolution experiments of Boolean logic networks, the cost of maintaining links between nodes is the driving force in the emergence of hierarchy [19]. Similarly, in metabolic networks, maintaining catalytic abilities between metabolites incurs a cost either as a tradeoff between specificity and efficiency, or from production and replication of unused enzyme [20][22].

Studying the evolution of modularity, and of containment hierarchy, or the hierarchical composition of modules can tell us about the evolutionary contingencies underlying the construction of metabolic networks. However by studying the flow hierarchy we can learn about the ecological niche that the bacteria fill [17]. We show that there is more conservation of hierarchy than of modularity and that hierarchy evolves independently of modularity. We employ the reverse ecology principle to understand how the hierarchical character of a metabolic network reflects the life history strategy of a bacterium in relationship to the growth-yield tradeoff, and its environmental niche.

## Results and Discussion

### Networks

Networks were reconstructed from 2,935 bacteria species in the KEGG database. These networks were robust to misannotation of enzymes. In random perturbations of the metabolic network for *E. coli* with 10% of the reactions removed, 95% the networks had hierarchy scores within 12% of the true network, and with 10% of reactions reversed, within 6% of the true network.

Network sizes ranged from 76 to 1496 metabolites, with a mean of 848. The smallest was the obligate insect parasite *Nasuia deltocephalinicola* and the largest was the soil bacterium *Burkholderia lata*.

### Hierarchy

Hierarchy scores for the metabolic networks were calculated using the GRC hierarchy score (see methods). The mean degree of hierarchy was 0.279, and ranged

from 0.065, for the insect symbiote Candidatus *Nasuia deltocephalinicola*, to 0.385 for a *Blattabacterium* endosymbiont of *Nauphoeta cinerea*, an insect endosymbiote. The hierarchy score for *E. coli* strains was 0.269 (Figure 1). For comparison with a random network and real world networks, GRC hierarchy scores for an Erdős-Rényi random graph is 0.058, a scale free network 0.127, and a tree 0.997, an estuary food web 0.814, and the neuronal network of *C. elegans* [23].

## Relationship to environment and growth rate

There is a fundamental ecological trade off between growth rate and yield, which is a result of the underlying efficiencies of the reactions. Bacteria that have a metabolism that produces the maximal growth rate per amount of carbon taken up will have suboptimal biomass production, and vice versa.

This tradeoff is representative of fundamentally divergent ecological strategies that bacteria use [24]. Furthermore, the tradeoffs between growth and yield are represented in the constraints on the metabolic network, such that high-yield strategies lead to more hierarchical networks. There is a tradeoff between enzyme specificity and efficiency, so when yield is favored there will be higher costs of maintaining edges in the network, which leads to hierarchy [25] [20]. Rapidly growing bacteria have more metabolic cycles which allow for metabolic flexibility at the cost of wasted energy, and these cycles decrease hierarchy [26]. The cost of maintaining unused enzymes in the genome is higher when efficiency is paramount [22].

Using a dataset of 111 bacteria with known growth rates, we see that the hierarchical character of the network correlates inversely with growth rate, Spearman  $\rho = -0.31$ ,  $p = 0.00065$ , fig 2. Furthermore, there is evidence that carbon efficiency constraints on bacteria differs greatly by environment, and that the evolutionary dynamics of carbon usage niche specialization are stronger within populations [27][28]. When we control for the bacterial environment, we see a correlation of  $\rho = -0.41$ , which is significantly greater than 0 ( $p = 0.0001$ , and significantly greater than the correlation when not controlling for the environment  $p = 0.003$ ).

Thus the hierarchical character of the metabolic networks reflects the growth rate of the organisms and their environmental niche. These constraints of edge weight and tradeoffs between hierarchical and ahierarchical networks in metabolism are similar to those made in social networks and supply chains [20] [21].

### 138 Relationship to other network properties

139 In addition to measuring hierarchy, we evaluated a number of other network statis-  
 140 tics. We computed node count, edge count, modularity (as measured by Girvan-  
 141 Newman betweenness centrality [29]), clustering coefficient, full diameter, effective  
 142 diameter, number of strongly connected components, proportion of the nodes in  
 143 the largest strongly connected component, and Luo Hierarchy score, an alternative  
 144 metric of hierarchy that measures the proportion of edges that do not participate  
 145 in any cycles. Edge and node count correlated most strongly with genetic distance.  
 146 However, after these basic structural properties, the statistics that correlated most  
 147 highly with genetic distance were the Girvan-Newman Modularity score and the  
 148 GRC hierarchy score (Table 1). We also computed the partial correlation for each  
 149 variable with genetic distance, controlling for the others, and found that the GRC  
 150 metric had the highest partial correlation.

### 151 Hierarchy Over Time

152 The hierarchy of the KEGG bacteria and reconstructed ancestors seems to first  
 153 increase, and then decrease with distance from the root of the tree (Figure 3).  
 154 Interestingly, with the dataset of 2,935 from the latest KEGG database, the cor-  
 155 relation of modularity and distance from the root of the tree found by Kreimer *et*  
 156 *al.* [13] is actually reversed. Modularity appears to increase rather than decrease  
 157 with distance from the root, (Figure 4). This correlation remains positive when  
 158 restricting analysis to the species used by Kreimer *et al.*.

159 As bacteria specialize to niches in a given ecosystem, they take on different  
 160 metabolic strategies, which are reflected in the hierarchical profile of the metabolic  
 161 network. This difference in strategies is consistent with the rise and fall of hierarchy  
 162 over the evolutionary trajectory. As microbes first adapt to new environments or  
 163 habitats (niche *sensu* Grinnell) they must gain novel metabolic functions, which are  
 164 added as pathways in the periphery in the network and which increases the hier-  
 165 archical character [30]. As complex relationships develop within the habitats, and  
 166 bacteria adapt to different resource use profiles and competitive strategies (niche  
 167 *sensu* Elton), the hierarchical profile of the metabolic network diversifies. Thus, the  
 168 decrease in hierarchy over evolutionary time is caused by more bacteria specializing  
 169 in a rapid-growth strategy, but the increasing variance in hierarchy reflects the fact

that not all bacteria adopt this strategy. In studying the adaptive strategies chosen by different bacteria, we may be able to make inferences about the bacteria and their environments, as well as the interplay between evolutionary and ecological dynamics.

## Correlation of Modularity and Hierarchy

Hierarchy and modularity are global properties of metabolic networks. Both correlate with bacterial specialization, and both change with distance from the root of the phylogenetic tree. Using the method of phylogenetic independent contrasts to look for correlation independent of phylogenetic structure, we found a moderate inverse correlation between modularity and hierarchy (Pearson correlation  $r = -0.18, p < 10^{-15}$ ), suggesting little evolutionary relationship between modularity and hierarchy [31]. Interestingly, simulated Boolean networks demonstrate a positive correlation between modularity and hierarchy [19].

## Conclusion

Characterizing the hierarchical structure of metabolic networks is useful in understanding the constraints under which these networks evolve. Hierarchy correlates with phylogenetic divergence, as would be expected for a trait subject to natural selection. This correlation is similar to the correlation of phylogenetic distance and modularity, suggesting that the hierarchical organization of networks, like modular organization, is important for function. However, modularity should be viewed as complementary to, rather than supplanted by, hierarchy when analyzing the global organization of metabolic networks. Both structural properties are conserved across phylogenies and evolve together. A better understanding of the character of metabolic networks is valuable in the growing field of ‘reverse ecology,’ in which the observed networks can be used to make inferences on possible environments [2][32][33].

By algorithmically reconstructing the metabolic networks, we are able to perform a larger-scale analysis than has previously been reported. Although the reaction annotations in KEGG may be prone to errors or omissions, we find that the GRC hierarchy metric is robust to small amounts of reaction omissions or reversals. By expanding the scope of the analysis, we find that modularity is actually inversely

correlated with distance from the root of the tree, contrary to what has been found in previous studies of a more limited set of bacteria.

From reconstructed ancestral metabolic networks, we are able to infer how hierarchy evolves in networks over time, and understand the interplay between evolutionary and ecological dynamics. Hierarchy shows an increase followed by a decrease across the phylogenetic tree, which is reflective of the adaptive process of bacteria, first to novel fundamental niches, and then to a realized niche. The net trend in decreasing hierarchy reflects a dominance of fast-growth, low-efficiency strategy.

## Methods

### Hierarchy Metric

Hierarchy scores were calculated using the global reaching centrality metric developed by Mones *et al.*, which is based on the local reaching centrality [23]. The local reaching centrality (LRC) of a node in a network is the fraction of the nodes of the network that can be reached starting at the focal node. More precisely, if the metabolic network is represented as a graph,  $G = (V, E)$  it can be said that  $v$  reaches  $v'$  if there exists a series of edges  $(v, v_i), (v_i, v_j) \dots (v_j, v') \in E$ . Let  $R(v)$  be the set of nodes  $v' \in V$  where  $v'$  is reachable from  $v$ . Then the LRC of  $v$  is  $\frac{|R(v)|-1}{|V|-1}$ . The GRC is then  $\frac{1}{|V|-1} \sum_{v \in V} \max_{v' \in V} \text{LRC}(v') - \text{LRC}(v)$

### Modularity Metric

The modularity metric was calculated using the SNAP package [34]. The modularity of a network is the optimal partitioning of the nodes into clusters to maximize  $Q = \frac{1}{4m} \sum_{ij} \left( A_{ij} - \frac{k_i k_j}{2m} I_{ij} \right)$ . Where  $m$  is the number of edges in the network,  $A_{ij}$  is the adjacency matrix, i.e.  $A_{ij}$  is 1 if there is an enzyme that converts metabolite  $i$  into metabolite  $j$ .  $k_i$  is the number of reactions that metabolite  $i$  participates in, and  $I_{ij} = 1$  if  $i$  and  $j$  are in the same module, and  $-1$  otherwise. Since finding the global optimal of  $Q$  is an NP-hard problem, we use the method developed by Girvan and Newman, which partitions the network by iteratively removing the edge with the highest betweenness centrality [29].

### Robustness of Reconstruction

The KEGG database is large, with heavy manual curation; however, this does not mean that the data are always perfect. A reaction may be favorable in one direction

in a model organism in laboratory conditions, but might proceed in the opposite direction or become bidirectional in different environments or species. It is also possible that reactions are missing from the database, or that an enzyme placed in an orthology group based on the study of one species may catalyze a different reaction in other species. To evaluate robustness to errors in the KEGG database, we examined the network for the well-studied bacterium, *E. coli*. We performed 100 replicates dropping or reversing 10% of the reactions, evaluated the hierarchy scores of these networks, and calculated the spread of the central 95% of hierarchy scores.

## Reconstruction of Genetic Distance

Following the methods often used in bacterial comparative genomics [35][3][36], for each of the 2,935 species, the 16s ribosomal sequence from KEGG was aligned to the Greenegenes database using PyNast, resulting in multiple sequence alignments for the 2,935 species [37][38]. The genetic distances between all pairs of bacterial species were computed using the Kimura distance metric [39].

## Reconstruction of Networks

For each bacterial species, a network of metabolites was inferred based on the enzymes present in the genome, the reactions known to be catalyzed by the enzymes present or orthologous enzymes, and a database of reaction substrates and products. The KEGG database of the genomic content of the 2,935 bacterial genomes was used to identify which enzyme classes were present in each genome and which reactions were present [40]. The reaction information from KEGG was supplemented by a the bioreaction database from Stelzer *et al.* which excludes currency metabolites, improves on predictions of directionality of reactions, and, for reactions with multiple substrates and products, provides carbon tracking of which substrates are converted to which products [41]. Using this reaction information, networks were constructed with metabolites as nodes, and a directed edge was placed between metabolites if there was a reaction that converted one metabolite to another. If reactions were reversible, then bi-directional edges were added between the substrates and products.

## 261 Ancestral Networks

262 To construct the ancestral networks, a phylogenetic tree was reconstructed using  
 263 RAxML 8.2.9 and the 16-state GTR nucleotide substitution model with gamma  
 264 rate heterogeneity [42]. The branch-length weighted average bootstrap support of  
 265 the partitions over 300 trees was 85.4. Using the maximum likelihood estimate of the  
 266 best tree, at each interior node of the phylogenetic tree, a genome was constructed  
 267 using the Fitch small parsimony algorithm. In cases where the presence or absence  
 268 of a gene was equally parsimonious, the gene was randomly selected to be included.  
 269 These ancestral genomes were then used to reconstruct ancestral networks, just as  
 270 the networks were constructed on the leaves of the tree.

## 271 Niche strategies

272 Growth rate data for 113 bacterial species and environmental annotations for those  
 273 bacteria, which for 68 species were gathered from NCBI, and manual curation fol-  
 274 lowing literature review was used for the remaining 45 [43][4]. Due to their low  
 275 number, the two aquatic species in the data set were excluded from further anal-  
 276 ysis. Correlations were calculated as Spearman's  $\rho$ . To calculate correlation con-  
 277 trolling for environment,  $\rho$  was calculated within each environment, and a species  
 278 weighted-average across environments was computed. Due to several bacteria hav-  
 279 ing the same growth rates,  $p$ -values were calculated using permutation tests rather  
 280 than the Student's  $t$ -distribution approximation. Significance tests were performed  
 281 with 100,000 permutations each. For the overall  $\rho$ , permutations were done across  
 282 all bacteria. To test the strength of the habitat-controlled correlation, growth rates  
 283 were permuted within habitat classes and the species-weighted  $\rho$  was computed for  
 284 each permutation. To test the effect of controlling for the environment, habitat la-  
 285 bels were permuted and the difference between the species weighted  $\rho$  and overall  
 286  $\rho$  was computed.

## 287 Consent to Publish

288 All authors have approved this manuscript for submission. This work has not been published or submitted elsewhere.

## 289 Competing interests

290 The authors declare that they have no competing interests.

## 291 Author Contributions

292 AG designed the experiment, carried out the analysis, and wrote the paper. MF provided critical guidance on the  
 293 direction of the work, and revision of the manuscript.

## 294 Availability of the Data

295 The dataset supporting the conclusions of this article, specifically the reconstructed metabolic network  
296 (Supplementary File 1) and topological statistics (Supplementary File 2) of these networks, are included within the  
297 article (and its additional files).

## 298 Acknowledgments

299 We are grateful to B Callahan, E Borenstein and J Leskovec for helpful feedback with this work, and to editor Richard  
300 Goldstein and two anonymous reviewers for there insightful comments.

## 301 References

- 302 1. Ma, H., Zeng, A.-p.: Reconstruction of metabolic networks from genome data and analysis of their global  
303 structure for various organisms. *Bioinformatics* **19**(2), 270–277 (2003)
- 304 2. Borenstein, E., Kupiec, M., Feldman, M.W., Ruppín, E.: Large-scale reconstruction and phylogenetic analysis of  
305 metabolic environments. *Proceedings of the National Academy of Sciences of the United States of America*  
306 **105**(38), 14482–7 (2008). doi:10.1073/pnas.0806162105
- 307 3. Levy, R., Borenstein, E.: Metabolic modeling of species interaction in the human microbiome elucidates  
308 community-level assembly rules. *Proceedings of the National Academy of Sciences* **110**(31), 12804–12809  
309 (2013). doi:10.1073/pnas.1300926110
- 310 4. Freilich, S., Kreimer, A., Borenstein, E., Yosef, N., Sharan, R., Gophna, U., Ruppín, E.:  
311 Metabolic-network-driven analysis of bacterial ecological strategies. *Genome biology* **10**(6), 61 (2009).  
312 doi:10.1186/gb-2009-10-6-r61
- 313 5. Brooks, R.: A robust layered control system for a mobile robot. *IEEE Journal on Robotics and Automation*  
314 **2**(1), 14–23 (1986). doi:10.1109/JRA.1986.1087032. 1010.0034
- 315 6. Teece, D.J.: Firm organization, industrial structure, and technological innovation. *Journal of Economic*  
316 *Behavior & Organization* **31**(2), 193–224 (1996). doi:10.1016/S0167-2681(96)00895-5
- 317 7. Luo, J., Magee, C.: Detecting evolving patterns of selforganizing networks by flow hierarchy measurement.  
318 *Complexity* (2011)
- 319 8. Czégel, D., Palla, G.: Random walk hierarchy measure: What is more hierarchical, a chain, a tree or a star?  
320 *Scientific Reports* **5**(December), 17994 (2015). doi:10.1038/srep17994. arXiv:1508.07732v1
- 321 9. Corominas-Murtra, B., Goñi, J., Solé, R.V., Rodríguez-Caso, C.: On the origins of hierarchy in complex  
322 networks. *Proceedings of the National Academy of Sciences of the United States of America* **110**(33),  
323 13316–21 (2013). doi:10.1073/pnas.1300832110. 1303.2503
- 324 10. Kashtan, N., Alon, U.: Spontaneous evolution of modularity and network motifs. *Proceedings of the National*  
325 *Academy of Sciences of the United States of America* **102**(39), 13773–13778 (2005).  
326 doi:10.1073/pnas.0503610102
- 327 11. Parter, M., Kashtan, N., Alon, U.: Environmental variability and modularity of bacterial metabolic networks.  
328 *BMC evolutionary biology* **7**, 169 (2007). doi:10.1186/1471-2148-7-169
- 329 12. Takemoto, K.: Does Habitat Variability Really Promote Metabolic Network Modularity? *PLoS ONE* **8**(4), 2–10  
330 (2013). doi:10.1371/journal.pone.0061348
- 331 13. Kreimer, A., Borenstein, E., Gophna, U., Ruppín, E.: The evolution of modularity in bacterial metabolic  
332 networks. *Proceedings of the National Academy of Sciences of the United States of America* **105**(19), 6976–81  
333 (2008). doi:10.1073/pnas.0712149105
- 334 14. Lorenz, D.M., Jeng, A., Deem, M.W.: The emergence of modularity in biological systems. *Physics of Life*  
335 *Reviews* **8**(2), 129–160 (2011). doi:10.1016/j.plrev.2011.02.003. 1204.5999
- 336 15. Ravasz, E., Somera, A.L., Mongru, D.A., Oltvai, Z.N.: Hierarchical Organization of Modularity in Metabolic  
337 *Networks* **297**(August), 1551–1555 (2002)
- 338 16. Sales-Pardo, M., Guimerà, R., Moreira, A.A., Amaral, L.A.N.: Extracting the hierarchical organization of  
339 complex systems. *Proceedings of the National Academy of Sciences of the United States of America* **104**(39),  
340 15224–15229 (2007). doi:10.1073/pnas.0703740104. 0705.1679
- 341 17. Braakman, R., Smith, E.: The compositional and evolutionary logic of metabolism. *Physical biology* **10**(1),  
342 011001 (2013). doi:10.1088/1478-3975/10/1/011001. 1207.5532

18. Muchnik, L., Itzhack, R., Solomon, S., Louzoun, Y.: Self-emergence of knowledge trees: Extraction of the Wikipedia hierarchies. *Physical Review E* **76**(1), 016106 (2007). doi:10.1103/PhysRevE.76.016106
19. Clune, J., Mouret, J.-B., Lipson, H.: The Evolutionary Origins of Hierarchy. *PLOS Computational Biology* **280**(1755), 20122863 (2016). doi:10.1098/rspb.2012.2863. 1207.2743v1
20. Nepusz, T., Vicsek, T.: Hierarchical self-organization of non-cooperating individuals. *PLoS ONE* **8**(12) (2013). doi:10.1371/journal.pone.0081449. 1308.0029
21. Hu, F., Zhao, S., Bing, T., Chang, Y.: Hierarchy in industrial structure: The cases of China and the USA. *Physica A: Statistical Mechanics and its Applications* **469**, 871–882 (2016). doi:10.1016/j.physa.2016.11.083
22. D'Souza, G., Waschina, S., Pande, S., Bohl, K., Kaleta, C., Kost, C.: Less is more: Selective advantages can explain the prevalent loss of biosynthetic genes in bacteria. *Evolution* **68**(9), 2559–2570 (2014). doi:10.1111/evo.12468
23. Mones, E., Vicsek, L., Vicsek, T.: Hierarchy measure for complex networks. *PLoS ONE* **7**(3), 1–10 (2012). doi:10.1371/journal.pone.0033799. 1202.0191
24. Lipson, D.A.: The complex relationship between microbial growth rate and yield and its implications for ecosystem processes. *Frontiers in Microbiology* **6**(JUN), 1–5 (2015). doi:10.3389/fmicb.2015.00615
25. Beardmore, R.E., Gudelj, I., Lipson, D.A., Hurst, L.D.: Metabolic trade-offs and the maintenance of the fittest and the flattest. *Nature* **472**(7343), 342–6 (2011). doi:10.1038/nature09905
26. Russell, J.B., Cook, G.M.: Energetics of bacterial growth: balance of anabolic and catabolic reactions. *Microbiological reviews* **59**(1), 48–62 (1995)
27. Sinsabaugh, R.L., Manzoni, S., Moorhead, D.L., Richter, A.: Carbon use efficiency of microbial communities: stoichiometry, methodology and modelling. *Ecology Letters* **16**(7), 930–939 (2013). doi:10.1111/ele.12113
28. Novak, M., Pfeiffer, T., Lenski, R.E., Sauer, U., Bonhoeffer, S.: Experimental tests for an evolutionary trade-off between growth rate and yield in *E. coli*. *The American naturalist* **168**(2), 242–51 (2006). doi:10.1086/506527
29. Girvan, M., Newman, M.E.J.: Community structure in social and biological networks. *Proceedings of the National Academy of Sciences of the United States of America* **99**(12), 7821–7826 (2002). doi:10.1073/pnas.122653799. 0112110
30. Da Silva, M.R., Ma, H., Zeng, A.P.: Centrality, network capacity, and modularity as parameters to analyze the core-periphery structure in metabolic networks. *Proceedings of the IEEE* **96**(8), 1411–1420 (2008). doi:10.1109/JPROC.2008.925418
31. Felsenstein, J.: Phylogenies and the Comparative Method. *The American Naturalist* **125**(1), 1–15 (1985). doi:10.1086/284325
32. Shapiro, B.J., Polz, M.F.: Ordering microbial diversity into ecologically and genetically cohesive units. *Trends in Microbiology* **22**(5), 235–247 (2014). doi:10.1016/j.tim.2014.02.006. NIHMS150003
33. Dekel, E., Mangan, S., Alon, U.: Environmental selection of the feed-forward loop circuit in gene-regulation networks. *Phys. Biol. Phys. Biol* **2**(2), 81–81 (2005). doi:10.1088/1478-3975/2/2/001
34. Leskovec, J., Sosič, R.: SNAP: A General-Purpose Network Analysis and Graph-Mining Library. *ACM Transactions on Intelligent Systems and Technology* **8**(1), 1–20 (2016). doi:10.1145/2898361
35. Chiu, H.C., Levy, R., Borenstein, E.: Emergent Biosynthetic Capacity in Simple Microbial Communities. *PLoS Computational Biology* **10**(7) (2014). doi:10.1371/journal.pcbi.1003695
36. Zaneveld, J., Turnbaugh, P.J., Lozupone, C., Ley, R.E., Hamady, M., Gordon, J.I., Knight, R.: Host-bacterial coevolution and the search for new drug targets. *Current Opinion in Chemical Biology* **12**(1), 109–114 (2008). doi:10.1016/j.cbpa.2008.01.015. NIHMS150003
37. DeSantis, T.Z., Hugenholtz, P., Larsen, N., Rojas, M., Brodie, E.L., Keller, K., Huber, T., Dalevi, D., Hu, P., Andersen, G.L.: Greengenes, a chimera-checked 16S rRNA gene database and workbench compatible with ARB. *Applied and Environmental Microbiology* **72**(7), 5069–5072 (2006). doi:10.1128/AEM.03006-05
38. Caporaso, J.G., Bittinger, K., Bushman, F.D., Desantis, T.Z., Andersen, G.L., Knight, R.: PyNAST: A flexible tool for aligning sequences to a template alignment. *Bioinformatics* **26**(2), 266–267 (2010). doi:10.1093/bioinformatics/btp636
39. Kimura, M.: A simple method for estimating evolutionary rates of base substitutions through comparative studies of nucleotide sequences. *Journal of Molecular Evolution* **16**(2), 111–120 (1980). doi:10.1007/BF01731581. arXiv:1011.1669v3

- 394 40. Ogata, H., Goto, S., Sato, K., Fujibuchi, W., Bono, H., Kanehisa, M.: KEGG: Kyoto encyclopedia of genes and  
395 genomes. *Nucleic Acids Research* **27**(1), 29–34 (1999). doi:10.1093/nar/27.1.29
- 396 41. Stelzer, M., Sun, J., Zeng, A.-P., Kamphans, T., Fekete, S.P.: An extended bioreaction database that  
397 significantly improves reconstruction and analysis of genome-scale metabolic networks. *Journal of Chemical*  
398 *Information and Modeling* **53**, 1689–1699 (2013). doi:10.1017/CBO9781107415324.004. arXiv:1011.1669v3
- 399 42. Stamatakis, A.: RAxML version 8: A tool for phylogenetic analysis and post-analysis of large phylogenies.  
400 *Bioinformatics* **30**(9), 1312–1313 (2014). doi:10.1093/bioinformatics/btu033. bioinformatics/btu033
- 401 43. Couturier, E., Rocha, E.P.C.: Replication-associated gene dosage effects shape the genomes of fast-growing  
402 bacteria but only for transcription and translation genes. *Molecular Microbiology* **59**(5), 1506–1518 (2006).  
403 doi:10.1111/j.1365-2958.2006.05046.x

|                      | Correlation | Partial Correlation |
|----------------------|-------------|---------------------|
| Node Count           | 0.26***     | 0.03***             |
| Edge Count           | 0.27***     | -0.02*              |
| Modularity           | 0.28***     | 0.05***             |
| GRC Hierarchy        | 0.28***     | 0.17***             |
| Luo Hierarchy        | 0.22***     | -0.06***            |
| Largest SCC Fraction | 0.30***     | 0.12***             |
| Cluster Coefficient  | 0.13***     | 0.03***             |
| Full Diameter        | 0.23***     | 0.06***             |
| Effective Diameter   | 0.20***     | 0.01                |
| SCC Count            | 0.14***     | 0.02**              |
| Mean Degree          | 0.24***     | -0.04***            |

**Table 1 Correlation of network statistics with phylogenetic distances, and partial correlation of network statistic with phylogenetic distance, controlling for the other variables. The correlation and partial correlation of GRC Hierarchy metric with genetic distance is higher than all other non-trivial metrics. \*\*\*:  $p$  value < 0.001, \*\*:  $p$  value < 0.01, \*:  $p$  value < 0.05.**

## 404 List of Figures

- 405     1     Histogram of GRC hierarchy scores of the 2,935 bacteria in the  
406             KEGG database. Mean degree of hierarchy is 0.279. Ranging from  
407             0.065 for the insect symbiote *Candidatus Nasuia deltocephalinicola*  
408             to 0.385 for a *Blattabacterium* endosymbiont of *Nauphoeta cinerea*,  
409             an insect endosymbiont. The hierarchy score for *E. coli* strains is 0.269. 16
- 410     2     The relationship between hierarchical character and growth rate re-  
411             flects fundamental tradeoffs between growth and yield, and is infor-  
412             mative of the ecological niche the bacteria occupy. Overall growth  
413             rate is inversely correlated with hierarchy  $\rho = -0.31$ ,  $p = 0.00065$ .  
414             When controlling for bacterial environment  $\rho = -0.41$ ,  $p = 0.0001$   
415             The outlier in the facultative parasite pane is *Borrelia burgdorferi*,  
416             which is an obligate parasite that alternates between insect and ver-  
417             tebrate hosts, and thus is similar to the obligate parasites. The par-  
418             ticular strain also lacks a number of enzymes in glycolysis pathway  
419             that are present in other *B. burgdorferi* strains which have hierarchy  
420             scores of  $0.183 \pm 0.002$ . . . . . 17
- 421     3     Hierarchy has a slight overall decreases with phylogenetic distance.  
422             Spearman's rank correlation,  $\rho = -0.06$ ,  $p < 10^{-6}$ . Hierarchy appears  
423             to increase and then decrease further from the root of the tree. . . . 18
- 424     4     Modularity increases with phylogenetic distance. Spearman's rank  
425             correlation,  $\rho = 0.31$ ,  $p < 10^{-15}$ . . . . . 19

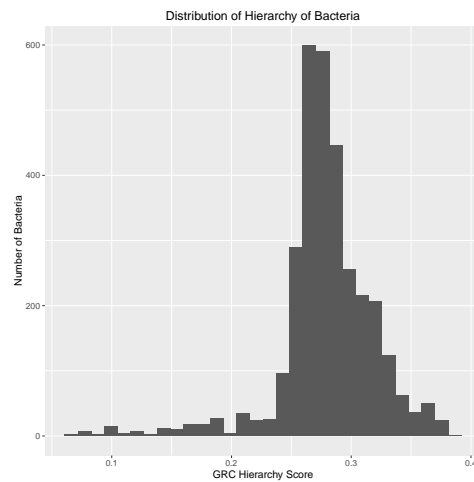

**Figure 1** Histogram of GRC hierarchy scores of the 2,935 bacteria in the KEGG database. Mean degree of hierarchy is 0.279. Ranging from 0.065 for the insect symbiote *Candidatus Nasuia deltocephalinicola* to 0.385 for a *Blattabacterium* endosymbiont of *Nauphoeta cinerea*, an insect endosymbiont. The hierarchy score for *E. coli* strains is 0.269.

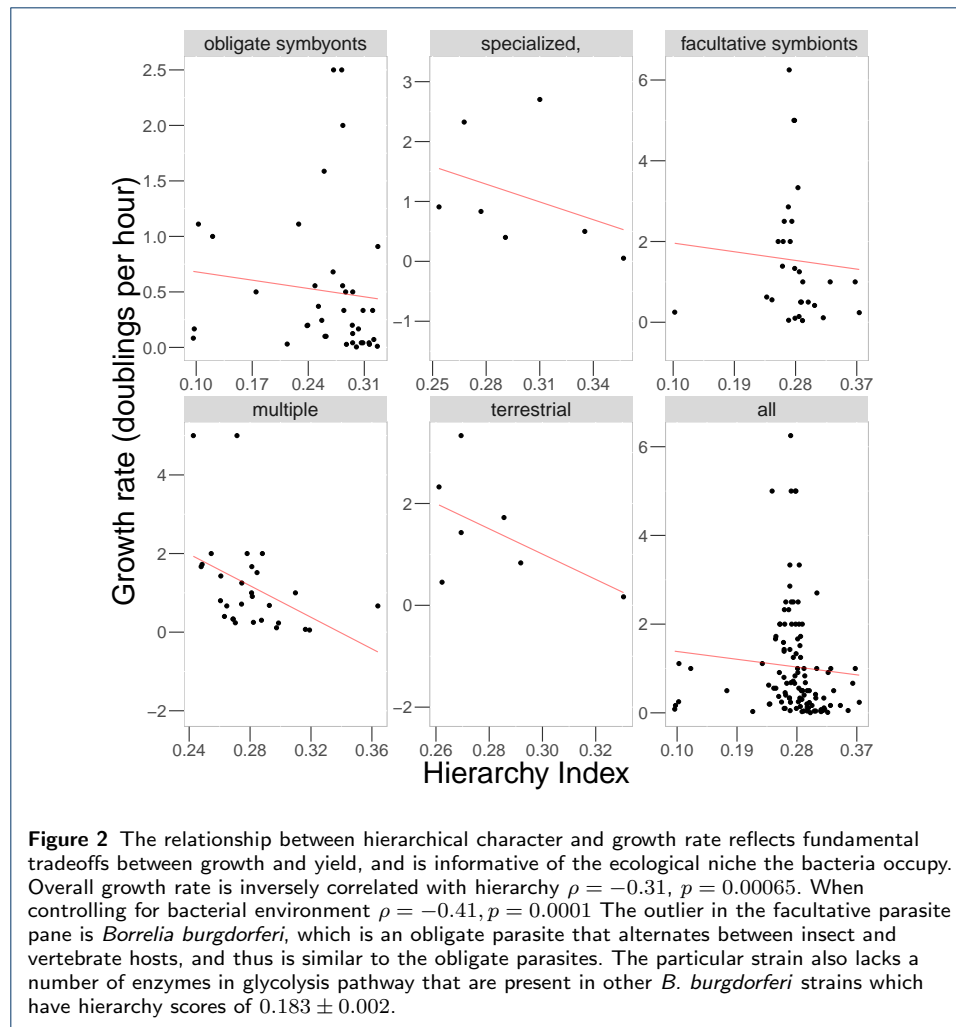

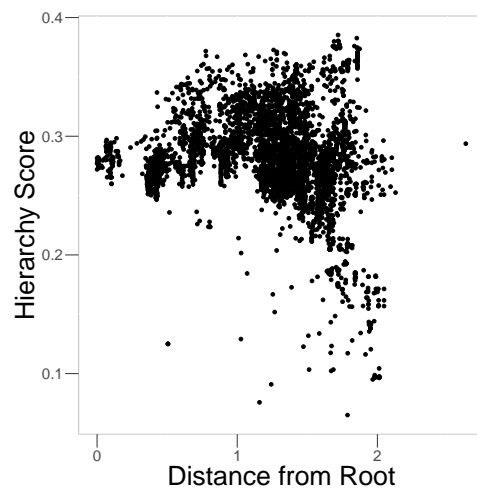

**Figure 3** Hierarchy has a slight overall decreases with phylogenetic distance. Spearman's rank correlation,  $\rho = -0.06$ ,  $p < 10^{-6}$ . Hierarchy appears to increase and then decrease further from the root of the tree.

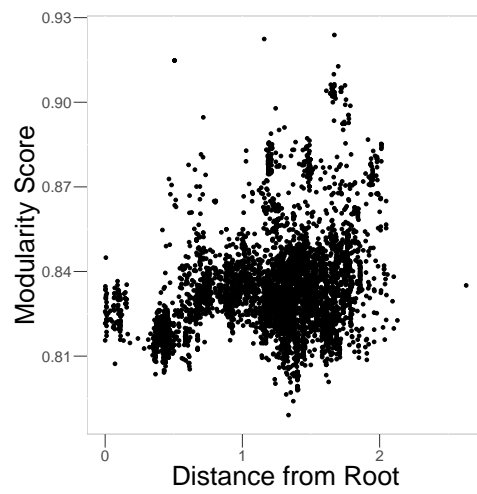

**Figure 4** Modularity increases with phylogenetic distance. Spearman's rank correlation,  $\rho = 0.31$ ,  $p < 10^{-15}$ .
